# Supplementary material for: Inhibition within a premotor circuit controls the timing of vocal turn-taking in zebra finches
Source: PubMed Central journal article supplement (PMC6954284; doi:10.1038/s41467-019-13938-0), 2020-01-10
Supplement: 41467_2019_13938_MOESM1_ESM.pdf [file 41467_2019_13938_MOESM1_ESM.pdf]

## Supplementary Information

### **Inhibition within a premotor circuit controls the timing of vocal turn-taking in zebra finches**

Jonathan I. Benichov, Daniela Vallentin\*

\*Correspondence to: [daniela.vallentin@orn.mpg.de](mailto:daniela.vallentin@orn.mpg.de)

#### **This PDF file includes:**

Supplementary Figs. 1–4

Captions for Supplementary Video 1

#### **Other Supplementary Materials for this manuscript include the following:**

Supplementary Video 1

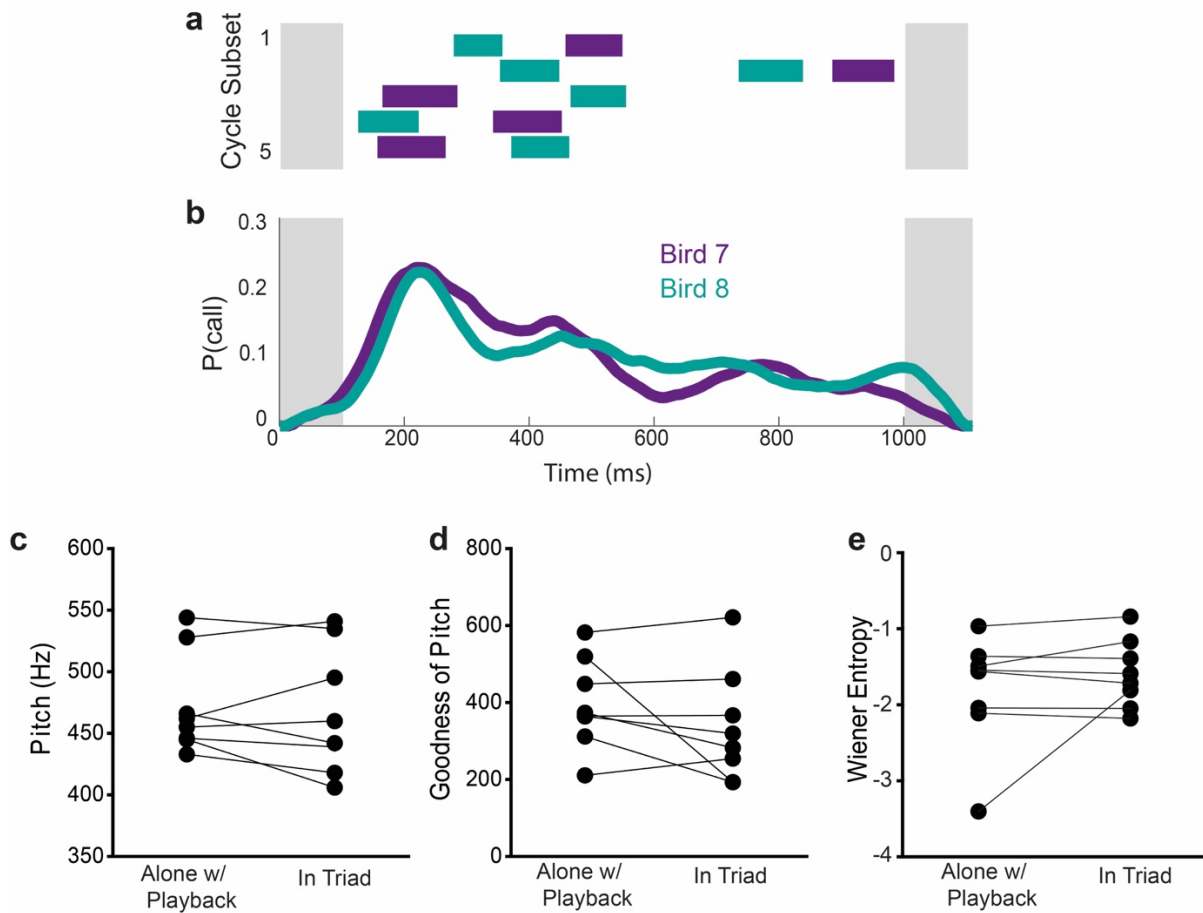

**Supplementary Fig. 1** Call Coordination and Call Acoustic Structure in Vocal Triads. **a** A subset of sequential call cycles demonstrating an alternating response pattern between Bird 7 (purple) and Bird 8 (turquoise) during the vocal triad condition. **b** Call response probability distributions for Birds 7 and 8 for a full 10-minute session when in triad with call playbacks (in grey). Peak response latencies remain similar, although the pair's alternating call sequences result in lower than expected simultaneous calling. **c** Mean call pitch for  $n = 8$  birds while alone with playbacks vs. in the triad condition (Alone w/playbacks =  $472 \pm 40$  Hz, in triad =  $467 \pm 51$  Hz, Wilcoxon sign rank test,  $p = 0.4609$ ). **d** Harmonic structure of calls as measured by mean Goodness of Pitch for  $n = 8$  birds while alone with call playbacks vs. in the triad condition (mean (alone w/playback) =  $397 \pm 118$ , (in triad) =  $337 \pm 146$ , Wilcoxon signed rank test,  $p = 0.3125$ ). **e** Average Wiener Entropy of calls for  $n = 8$  birds while alone with call playbacks vs. in triad condition (mean(alone w/playback) =  $-1.81 \pm 0.74$ , (in triad) =  $-1.59 \pm 0.45$ , Wilcoxon signed rank test,  $p = 0.8438$ ). Note: Each bird's average was calculated from 54-243 calls for all acoustic features.

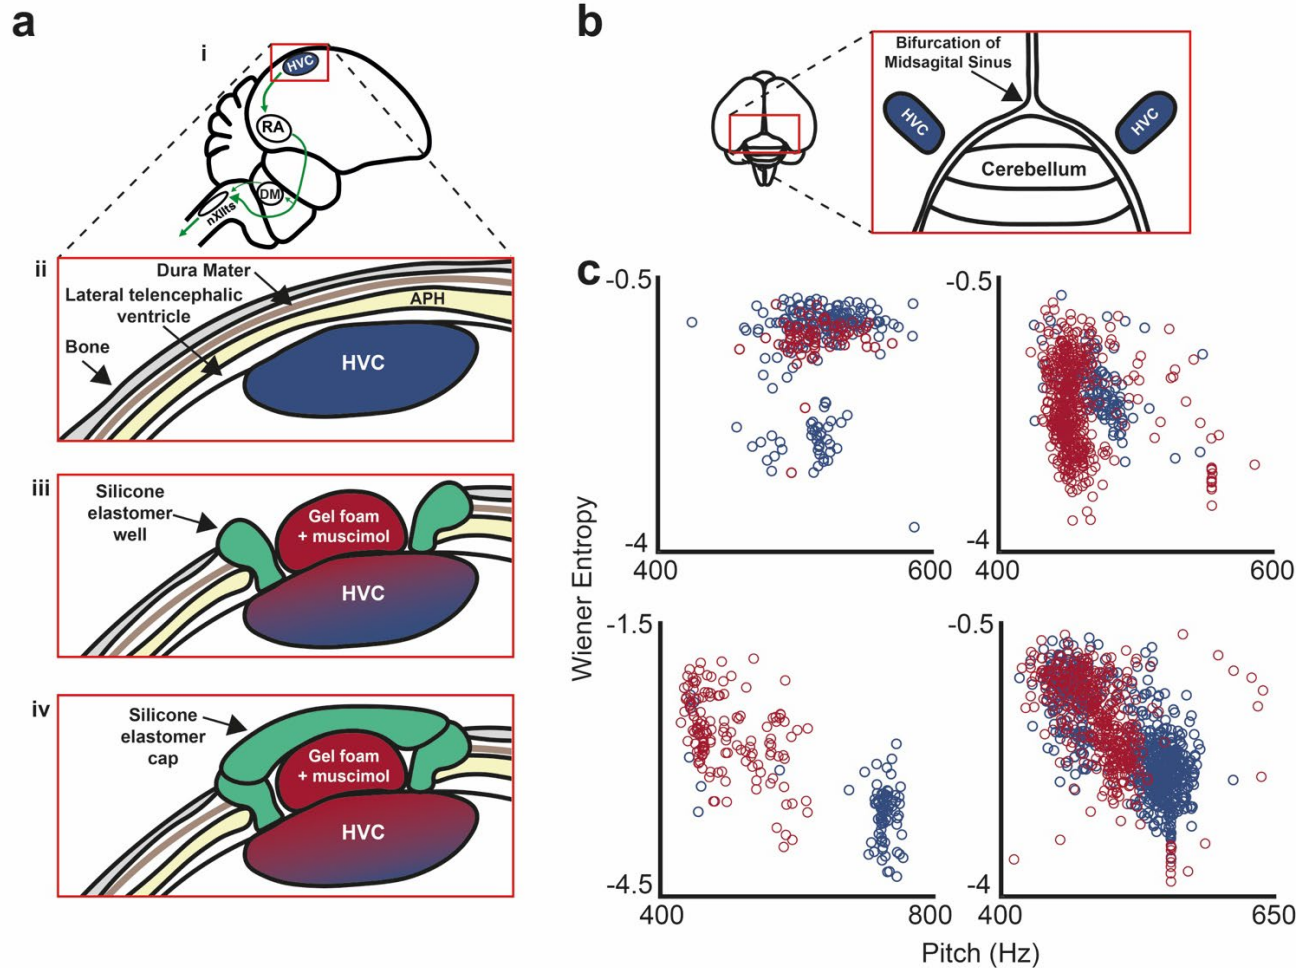

**Supplementary Fig. 2 a)** Schematic of pharmacological infusion from the dorsal surface of HVC. i) Illustration of sagittal section of zebra finch vocal motor pathway (RA:robust nucleus of the arcopallium; DM: dorsomedial part of the intercollicular nucleus; nXIIts: 12<sup>th</sup> cranial (tracheosyringeal) nerve. ii) Bone, dura mater, APH (area parahippocampalis), and the lateral telencephalic ventricle are situated above HVC. iii) A craniotomy is cut, dura mater and APH are resected, and a silicone elastomer well is created around the perimeter of the craniotomy. A gel foam sponge soaked in 40°C 5mM muscimol is placed directly on the surface of HVC. iv) A silicone elastomer cap seals the well and the animal is returned to the recording chamber for behavioral testing. **b)** Schematic of a dorsal view of the zebra finch brain, indicating positions of bilateral craniotomies above HVC. **c)** Acoustic Features of Calls During Control and Muscimol Conditions. Changes in acoustic features of calls for 4 birds during infusion with muscimol (red) vs. saline controls (blue, as in Fig. 2g); entropy(control) =  $-2.52 \pm 1.13$ , entropy(muscimol) =  $-2.21 \pm 0.79$ , 2d-Kolmogorov-Smirnov test<sup>1</sup>,  $p < 0.01$  Bonferroni correction).

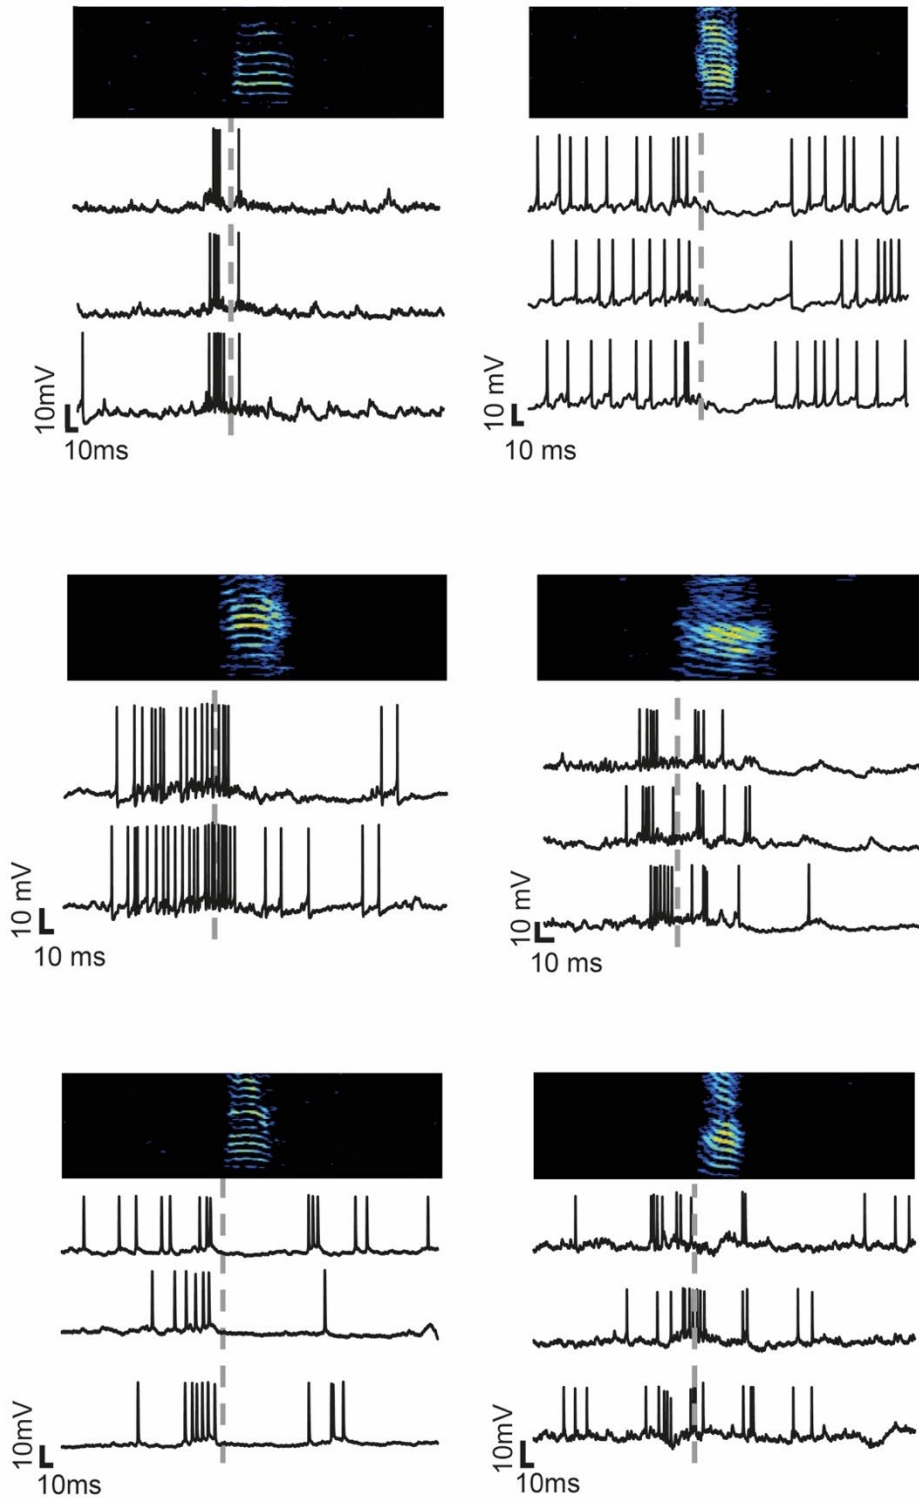

**Supplementary Fig. 3** HVC Interneuron Activity During Call Production. Intracellular recordings of six HVC interneurons during multiple renditions of call production. Dotted grey lines indicate onsets of calls.

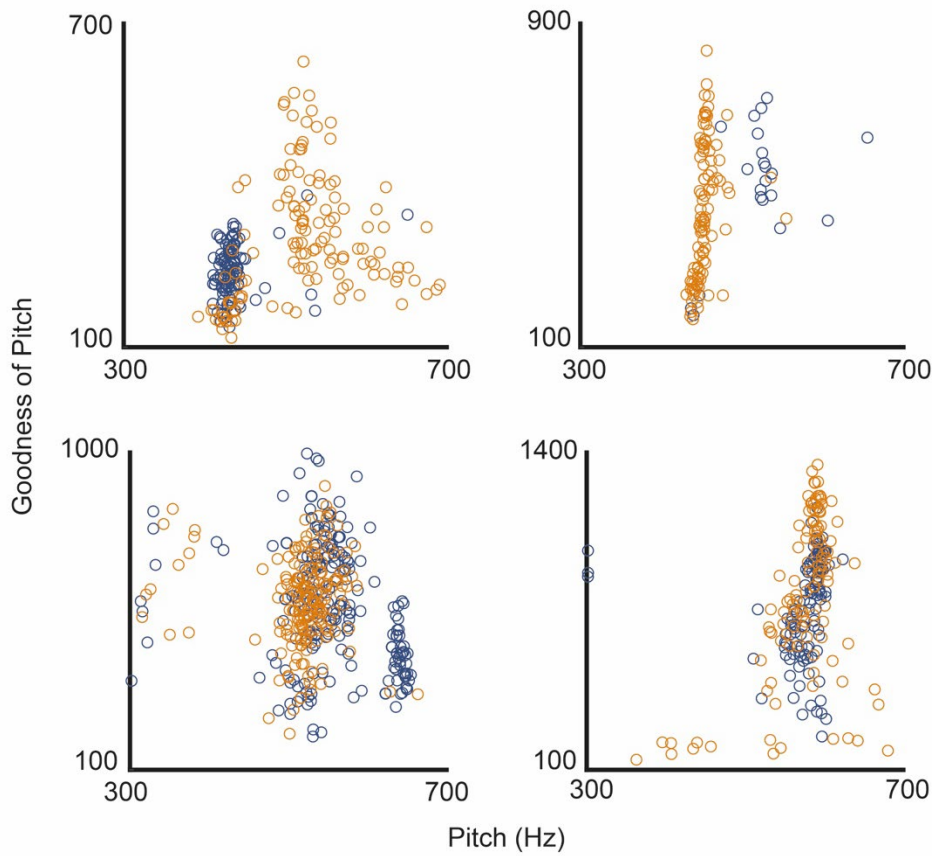

**Supplementary Fig. 4** Acoustic Features of Calls During Control and Gabazine Conditions. Changes in acoustic features of calls for 4 birds during infusion with saline controls (blue) vs. gabazine (orange), (as in Fig. 5g), (2d-Kolmogorov-Smirnov test <sup>1</sup>,  $p < 0.01$  Bonferroni correction (4/5 birds)).

## References

1. Peacock JA. Two-Dimensional Goodness-of-Fit Testing in Astronomy. *Mon Not R Astron Soc* **202**, 615-627 (1983).
