# Supplementary material for: Inhibition within a premotor circuit controls the timing of vocal turn-taking in zebra finches
Source: PubMed Central journal article supplement (PMC6954284; doi:10.1038/s41467-019-13938-0), 2020-01-10
Supplement: 41467_2019_13938_MOESM3_ESM.pdf [file 41467_2019_13938_MOESM3_ESM.pdf]

## **Description of Additional Supplementary Files**

File Name: Supplementary Movie 1

Description: Zebra Finch Vocally Interacting with Call Playback During Saline Control and Gabazine Conditions. Concatenated video sequences when the bird responded to call playbacks during saline and gabazine conditions.
